# Supplementary material for: Eumetazoan Cryptochrome Phylogeny and Evolution
Source: PubMed Central journal article supplement (PMC4350181; doi:10.1093/gbe/evv010), 2015-01-18
Supplement: supp_evv010_Haug_Supplementary_table.pdf [file supp_evv010_Haug_Supplementary_table.pdf]

|                                      |      |                          |         |                                            |                                     |                |                      |                   |                      |        |         |
|--------------------------------------|------|--------------------------|---------|--------------------------------------------|-------------------------------------|----------------|----------------------|-------------------|----------------------|--------|---------|
| <i>Pontastacus leptodactylus</i>     | ple  | Galician Crayfish        | Cry1    | --                                         | --                                  | --             | GAF501016708_1       | --                | --                   | yes    | partial |
| <i>Petromyzon marinus</i>            | pma  | Sea lamprey              | Cry1    | cryptochrome DASH                          | ENSPMAG0000004074                   | --             | ENSPMAT0000004504    | ENSPMAP0000004487 | --                   | no     | partial |
| <i>Python molurus</i>                | pmo  | Indian python            | Cry1    | --                                         | AEQU02105487-94                     | --             | --                   | --                | --                   | n.a    | Full    |
|                                      |      |                          | Cry2    | --                                         | AEQU02146289-1                      | --             | --                   | --                | --                   | n.a    | Full    |
| <i>Pelodiscus sinensis</i>           | psi  | Chinese softshell turtle | Cry1    | cryptochrome-1-like; cryptochrome 1 (CRY1) | 102443469 ENSPSPG00000014000        | XM_006138065.1 | ENSPSIT00000015866   | XP_006138127.1    | ENSPSP00000015791    | no     | Full    |
|                                      |      |                          | Cry2    | cryptochrome 2 (photolase-like) CRY2       | 102450877 ENSPSPG00000012472        | XM_006124501.1 | ENSPSIT00000014694   | XP_006124563.1    | ENSPSP00000014616    | no     | partial |
|                                      |      |                          | Cry4    | cryptochrome-1-like                        | 102460658 ENSPSPG00000012458        | XM_006115696.1 | ENSPSIT00000014515   | XP_006115758.1    | ENSPSP00000014447    | yes/no | Full    |
|                                      |      |                          | Cry5    | cryptochrome-1-like                        | AGCLU01007701-02 ENSPSPG00000013409 | --             | ENSPSIT00000015155   | --                | ENSPSP00000015084    | yes/no | Full    |
| <i>Parasteatoda tepidariorum</i>     | pte  | Common house spider      | Cry1    | --                                         | AOMJ01140962.1                      | --             | --                   | --                | --                   | n.a    | partial |
|                                      |      |                          | Cry5    | --                                         | AOMJ01119002.1                      | --             | --                   | --                | --                   | n.a    | partial |
|                                      |      |                          | Cry6    | --                                         | AOMJ01100131.1.....                 | --             | --                   | --                | --                   | n.a    | partial |
| <i>Ramulus artemis</i>               | rar  | Vietnamese Stick Bug     | Cry1    | --                                         | --                                  | --             | --                   | --                | --                   | --     | --      |
|                                      |      |                          | Cry5    | --                                         | --                                  | --             | --                   | --                | --                   | --     | --      |
|                                      |      |                          | Cry6    | --                                         | --                                  | --             | --                   | --                | --                   | --     | --      |
| <i>Rhadnius prolixus</i>             | rpr  | Kissing bug              | Cry1    | --                                         | ACP802032730-31                     | --             | --                   | --                | --                   | n.a    | partial |
| <i>Saccoglossus kowalevskii</i>      | ska  | Acorn worm               | no crys | --                                         | --                                  | --             | --                   | --                | --                   | --     | --      |
| <i>Schistosoma mansoni</i>           | sma  | Blood worm               | no crys | --                                         | --                                  | --             | --                   | --                | --                   | --     | --      |
| <i>Stegodyphus mimosarum</i>         | smi  | Social spider            | Cry1    | --                                         | AZAO01011524.1                      | --             | --                   | --                | --                   | n.a    | partial |
|                                      |      |                          | Cry5    | --                                         | AZAO01115667-72                     | --             | --                   | --                | --                   | n.a    | partial |
|                                      |      |                          | Cry6    | --                                         | AZAO01021104-06                     | --             | --                   | --                | --                   | n.a    | partial |
| <i>Strigamia maritima</i>            | stma | European centipede       | no crys | --                                         | --                                  | --             | --                   | --                | --                   | --     | --      |
| <i>Stylophora pistillata</i>         | spl  | Hood coral               | Cry1    | --                                         | --                                  | --             | GARY01007221_1       | --                | --                   | n.a    | partial |
|                                      |      |                          | Cry2    | --                                         | --                                  | --             | GARY01026968_1       | --                | --                   | n.a    | partial |
|                                      |      |                          | Cry5    | --                                         | --                                  | --             | GARY01010209_1       | --                | --                   | n.a    | Full    |
| <i>Strongylocentrotus purpuratus</i> | spu  | Sea Urchin               | Cry1    | cryptochrome-1-like                        | 580742 SPU_007204                   | XM_780780.3    | SPU_007204-tr        | XP_785873.3       | SPU_007204-tr        | yes    | partial |
|                                      |      |                          | Cry5    | cryptochrome-2-like                        | 583959 SPU_019722                   | XM_783845.3    | SPU_019722-tr        | XP_788938.2       | SPU_019722-tr        | yes    | Full    |
|                                      |      |                          | Cry6    | cryptochrome-1-like                        | 581225 SPU_000282                   | XM_781238.3    | SPU_000282-tr        | XP_786331.2       | SPU_000282-tr        | yes    | Full    |
| <i>Solanum tuberosum</i>             | stu  | Potato                   | CryP1   | 6-4 photolase like                         | 102605735 PGSC00030DMG40002862      | XM_006346527.1 | PGSC00030DMT40007368 | XP_006346589.1    | PGSC00030DMT40007368 | yes/no | Full    |
| <i>Tribolium castaneum</i>           | tca  | Red flour beetle         | Cry1    | cryptochrome 2                             | 661402 TCGS2-TC010454               | NM_001083325.1 | TCGS2-TC010454-RA    | NP_001076794.1    | TCGS2-TC010454-PA    | yes    | Full    |
| <i>Taeniopygia guttata</i>           | tgu  | Zebra finch              | Cry1    | cryptochrome 1 (photolase-like) CRY1       | 100223409 ENSTGUG000000010990       | XM_002196518.2 | ENSTGLUT00000011476  | XP_002196554.2    | ENSTGUP00000011352   | no     | Full    |
|                                      |      |                          | Cry2    | cryptochrome 2 (photolase-like) CRY2       | 100224803 ENSTGUG00000010722        | XM_002198864.2 | ENSTGLUT00000011186  | XP_002198900.1    | ENSTGUP00000011066   | no     | Full    |
|                                      |      |                          | Cry4    | cryptochrome-1-like                        | 100231203 ENSTGUG0000001403         | XM_002198497.2 | ENSTGLUT0000001465   | XP_002198533.1    | ENSTGUP0000001452    | yes    | Full    |
| <i>Takifugu rubripes</i>             | tru  | Torifugu                 | Cry1    | cryptochrome 1 (CRY1)                      | CAAB0201844.1 ENSTRUG0000001402     | --             | ENSTRUT00000036025   | --                | ENSTRUP00000035895   | yes    | Full    |
|                                      |      |                          | Cry2    | cryptochrome-2-like; cryptochrome 2 (CRY2) | 101061375 ENSTRUG0000001532         | XM_003976633.1 | ENSTRUT00000039292   | XP_003976682.1    | ENSTRUP00000039151   | no     | Full    |
|                                      |      |                          | Cry3    | cryptochrome 2a (CRY2a)                    | CAAB02010204-08 ENSTRUG0000001852   | --             | ENSTRUT00000004295   | --                | ENSTRUP00000004271   | no     | partial |
|                                      |      |                          | Cry5    | cryptochrome 5                             | 101062553 ENSTRUG0000003780         | XM_003969514.1 | ENSTRUT00000008943   | XP_003969563.1    | ENSTRUP00000008892   | no     | Full    |
| <i>Tetranychus urticae</i>           | tur  | Two-spotted spider mite  | Cry1    | --                                         | CAEY01002034.1 tetur09q05920_1      | --             | tetur09q05920_1      | --                | tetur09q05920_1      | no     | partial |
|                                      |      |                          | Cry6    | --                                         | CAEY01000279.1 tetur16g02770_1      | --             | tetur16g02770_1      | --                | tetur16g02770_1      | no     | Full    |
| <i>Trichuris trichiura</i>           | ttr  | Human whipworm           | no crys | --                                         | --                                  | --             | --                   | --                | --                   | --     | --      |
| <i>Varroa destructor</i>             | vde  | Varroa mite              | no crys | --                                         | --                                  | --             | --                   | --                | --                   | --     | --      |
| <i>Volvox carterii</i>               | vca  | Spherical alga           | CryA1   | DNA photolase                              | 9621412                             | XM_002945880.1 | --                   | XP_002945926.1    | --                   | no     | partial |
| <i>Xenopus tropicalis</i>            | xtr  | Western clawed frog      | Cry1    | cryptochrome 1 (photolase-like) CRY1       | 550065 ENSXETG00000016951           | NM_001017311.3 | ENSXETT000000062200  | NP_001017311.2    | ENSXETP000000059100  | yes/no | Full    |
|                                      |      |                          | Cry2    | cryptochrome 2 (photolase-like) CRY2       | 100422810 ENSXETG0000001023         | XM_002934092.1 | ENSXETT0000000232    | XP_002934138.2    | ENSXETP0000000232    | yes/no | Full    |
|                                      |      |                          | Cry4    | cryptochrome 4 (cry4); Cry1 protein        | 100170456 ENSXETG00000015354        | NM_001130234.1 | ENSXETT00000033570   | NP_001123706.1    | ENSXETP00000033570   | yes/no | Full    |
|                                      |      |                          | Cry5    | --                                         | 100144974 ENSXETG00000003913        | NM_001126540.1 | ENSXETT00000008500   | NP_001120012.1    | ENSXETP00000008500   | no/yes | Full    |
| <i>Zootermopsis nevadensis</i>       | zne  | Nevada Dampwood Termite  | Cry1    | --                                         | --                                  | --             | --                   | --                | --                   | --     | --      |
| <i>Zea mays</i>                      | zma  | Corn                     | CryP1   | --                                         | 100280217 GRMZM2G052821             | NM_001153148.1 | GRMZM2G052821_T01    | NP_001146620.1    | GRMZM2G052821_P01    | no/yes | Full    |
